# Supplementary material for: Spectrum analysis of inborn errors of metabolism for expanded newborn screening in Xinjiang, China
Source: PeerJ. 2024 Dec 9;12:e18173. doi: 10.7717/peerj.18173 (PMC11636536; doi:10.7717/peerj.18173)
Supplement: Supplemental Information 1 [file peerj-12-18173-s001.xlsx]

## Sheet: 36 cases diagnosed in 2019-2021
Raw data of Confirmed cases
Case Number	Newborn’s birth Year and month	newborn’s Sex	Birth weight (g)	Nationality	Gestational age (weeks)	Mode of delivery	First Screening date	Abnormal MS/MS indicators	First MSMS screening result	GC-MS Result	gene	mutant site	Confirmed	Other informations
1	2019.5	Female	3100	Han nationality	38	Cesarean section	2019.5.6	C4 C4/C3 C4/C2	0.71 0.72 0.06	Ethylmalonic acid increased（99.04）	ACADS	c.989G>A p.R330H，P c.164C>T p.P55L，LP	SCADD	2020.6.24 follow-upC4：0.99； family member had the same two mutations
2	2019.9	Female	3430	Han nationality	39+2	Spontaneous labor	2019.9.6	C5 C5/C2 C5/C3	4.56 0.281 2.606	Increase in isovaleryl glycine（17.48/ 26.12）	IVD	c.1195G>C; p.Asp399His,Het，LP	IVA
3	2019.11	Male	2670	Han nationality	37+3	Cesarean section	2019.11.25	C3 C3/C2 C3/C0 Met	14.39 0.35 0.728 6.51（Normalcy）	Methylmalonic acid, methyl citric acid increased	MMACHC	c.445_446delTG （p.Cys149fs) , P；c.567dupT (p.Ile190fs), P.	MMA
4	2019.2	Female	2370	Han nationality	38	Cesarean section	2019.2.22	Phe Phe/Tyr	112 1.81	-	PAH	c.331C>T (p.Arg111Ter), P	Mild HPA	Clinical diagnosis
5	2019.3	Male	3620	Han nationality	40+1	Cesarean section	2019.3.12	Phe Phe/Tyr	172 20.75	-	PAH	c.740G>T (p.Gly247Val), P；c.158G>A (p.Arg53His), P.	Mild HPA	Clinical diagnosis
6	2019.3	Female	4718	Kazak	41+1	Spontaneous labor	2019.3.24	Phe Phe/Tyr	189 4.02	-	PAH	c.688G>A (p.Val230Ile), P；c.1174T>A (p.Phe392Ile), LP	Mild HPA	Clinical diagnosis
7	2019.3	Female	3050	Han nationality	38+6	Cesarean section	2019.3.25	Phe Phe/Tyr	135 1.1	-	PAH	c.158G>A (p.Arg53His), P; c.526C>T (p.Arg176Ter), P.	Mild HPA	Clinical diagnosis
8	2020.1	Female	2640	Han nationality	38	Cesarean section	2020.2.3	C3 C3/C2 C3/C0	7.96 0.371 0.259	Methyl citric acid was elevated（18.14）	PCCB	c.1316A>G (p.Tyr439Cys), P；c.1364G>T (p.Trp455Leu),LP.	PA	2020.3.20 HCY level is normal
9	2019.12	Male	2750	Han nationality	36+1	Cesarean section	2020.2.7	C3 C3/C2 C3/C0 C5	22.4 0.449 0.62 0.63	Methylmalonic acid（769.09）, methyl citric acid（21.71） increased	MMUT	c.914T>C (p.L305S), P； c.1106G>A (p.R369H),P.	MMA
10	2020.3	Female	3410	Uygur ethnic group	37+6	Spontaneous labor	2020.3.15	Phe Phe/Tyr	126.28 0.792	-	PAH	c.688G>A (p.Val230Ile), P；c.158G>A (p.Arg53His), P.	Mild HPA
11	2020.4	Male	3440	Hui nationality	38+4	Cesarean section	2020.5.1	C5DC C5DC/C8 C0	2.54 63.5 15.33	Glutaric acid elevated significantly（805.33）	GCDH	c.532G>A(p.G178R), P；c.892G>A(p.A298T), LP	GA- I	Dietary control, regular follow-up, and delayed growth and development
12	2020.6	Female	3940	Uygur ethnic group	38+2	Spontaneous labor	2020.6.25	Phe Phe/Tyr	199.22 2.409	-	PAH	c.208_210del (p.Leu70del), P；c.355C>T (p.Pro119Ser), VUS.	Moderate PKU
13	2020.7	Male	2600	Han nationality	36+4	Cesarean section	2020.7.10	C3 C3/C2 C3/C0 Val Leu	15.16 0.708 0.945 218.89 246.42	Methylmalonic acid（678.06）, methyl citric acid （22.67），3-hydroxypropionic acid（13.4）et al increased	MUT	c.1677-1G>A(p.-) ,P; c.729_730insTT(p.Asp244LeufsTer39), P.	MMA
14	2020.6	Male	3680	Han nationality	40+2	Spontaneous labor	2020.6.26	C0	5.47	-	SLC22A5	c.254_264dupGGCTCGCCACC (p.I89Gfs*45), P；c.629A>G(p.N210S), LP	PCD
15	2020.8	Female	3780	Uygur ethnic group	39+6	Cesarean section	2020.8.18	Phe Phe/Tyr	950.86 8.196	-	-	-	Classical PKU	Refusing genetic diagnosis, the family already has confirmed PKU cases
16	2020.1	Female	3500	Han nationality	39+2	Cesarean section	2020.10.22	Phe Phe/Tyr	561.4 11.413	-	PAH	c.442-1G>A (p.---), P	Classical PKU
17	2020.1	Male	3170	Han nationality	38+1	Spontaneous labor	2020.10.23	Phe Phe/Tyr	139.6 ---	-	PAH	c.158G>A (p.Arg53His) ,P	Mild HPA
18	2020.1	Female	3590	Han nationality	39+2	Cesarean section	2020.10.23	Phe Phe/Tyr	906.25 11.09	-	PAH	c.907delT (p.Pro303Profs),P c.722delG (p.Ala241Alafs*41),P	Classical PKU
19	2020.1	Female	3050	Han nationality	38+1	Spontaneous labor	2020.10.14	Phe Phe/Tyr	107.04 1.941	-	PAH	c.158G>A (p.Arg53His), P; c.707-1G>A (p.---), P.	Mild HPA
20	2020.11	Male	2185	Han nationality	36+5	Spontaneous labor	2020.12.24	Phe	137.27	-	PAH	c.782G>A (p.Arg261Gln) , P ; c.158G>A (p.Arg53His), P	Mild HPA
21	2021.1	Female	2700	Mongolian nationality	39	Cesarean section	2021.1.29	Phe Phe/Tyr	129.06 1.869	-	PAH	c.1238G>C (p.Arg413Pro) , P; c.212G>A(Arg>His) , LP	Mild HPA
22	2021.2	Female	2650	Han nationality	38+3	Cesarean section	2021.2.12	C3 C3/C2 C3/C0	11.77 0.576 0.756	Methylmalonic acid, methyl citric acid increased	MMACHC	c.609G>A (p.W203*) ,P; c.217C>T (p.A222V), P.	MMA combined with HCY	Elevated blood HCY
23	2021.2	Male	2810	Han nationality	38+2	Cesarean section	2021.2.13	Phe Phe/Tyr	156.99 2.402	-	PAH	c.158G>A (p.Arg53His), P; c.977G>A (p.Trp326Ter) , P.	Mild HPA
24	2021.2	Male	2900	Han nationality	41+5	Cesarean section	2021.2.25	Phe Phe/Tyr	128.7 1.243	-	PAH	c.728G>A (p.Arg243Gln) , P; c.158G>A (p.Arg53His) , P;	Mild HPA	2021.3.15 Phe 135.62 Phe/Tyr1.155
25	2021.7	Male	3000	Han nationality	37+2	Spontaneous labor	2021.7.29	Phe Phe/Tyr	1115.47 10.404	-	PAH	c.739G>C，Hom（p.G247R），P	Classical PKU
26	2021.8	Female	2900	Han nationality	38+3	Cesarean section	2021.8.9	Phe Phe/Tyr	114 1.761	-	PAH	c.158G>A (p.Arg53His) , P; c.1238G>C (p.Arg413Pro),P	Mild HPA
27	2021.8	Male	3770	Han nationality	37+6	Cesarean section	2021.8.26	Phe Phe/Tyr	147.04 1.173	-	PAH	c.688G>A (p.Val230Ile),P；c.1256A>G（p.Gln419Arg）,P	Mild HPA
28	2021.8	Female	3360	Uygur ethnic group	39+2	Spontaneous labor	2021.8.21	Phe Phe/Tyr	136.07 1.743	-	PAH	c.1301C>A (p.Ala434Asp) , P c.158G>A (p.Arg53His), P	Mild HPA
29	2021.9	Female	3280	Hui nationality	40	Spontaneous labor	2021.9.8	Phe Phe/Tyr	272.56 2.299	-	PAH	c.331C>T（p.Arg111Ter）, P c.1174T>A（p.Phe392Ile）, P	Mild HPA
30	2021.9	Male	4140	Uygur ethnic group	40+4	Spontaneous labor	2021.9.16	Phe Phe/Tyr	420.46 6.51	-	PAH	c.311C>A (p.Ala104Asp) , P; c.1316-1G>A ( p./ ), P	Moderate PKU
31	2021.1	Male	3710	Han nationality	41+4	Cesarean section	2021.10.19	C3 C3/C0 C3/C2	6.87 0.263 0.329	Methylmalonic acid increased（769.09）	MMUT	c.1663G>A (p.Ala555Thr) , LP; c.632_636del (p.Glu211AlafsTer8),P	MMA	Slight increase of homocysteine（HCY）15.5（4-15.4）
32	2021.11	Male	3380	Han nationality	39+1	Spontaneous labor	2021.11.4	Phe Phe/Tyr	527.12 8.208	-	PAH	c.782G>A (p.Arg261Gln) ,P	Moderate PKU
33	2021.11	Female	4100	Han nationality	39+4	Spontaneous labor	2021.11.17	C5OH C5OH/C0 C5OH/C8 C0	7.5 0.559 375	3-hydroxyisovalerate（86.08）, 3-methyl crotonyl glycine （96.11）and methyl crotonyl glycine（234.12） elevated significantly	MCCC1	c.1977G>A (p.Lys659Lys) ,LP; c.1679dupA (p.Asn560fs),P;	3MCCD	Sister，carry MCCC1, c.1679dupA (p.Asn560fs)
34	2021.11	Male	3440	Han nationality	39	Spontaneous labor	2021.12.1	Phe Phe/Tyr	346.68 4.84	-	PAH	c.721C>T (p.Arg241Cys), P	Moderate PKU
35	2021.11	Female	3750	Uygur ethnic group	42+5	Cesarean section	2021.11.26	Phe Phe/Tyr	804.09 9.049	-	PAH	c.200C>G (p.Ser67Cys), Hom, VUS	Classical PKU
36	2021.12	Male	4200	Han nationality	39+4	Spontaneous labor	2021.12.11	Phe Phe/Tyr	162.05 2.8	-	PAH	c.694C>T (p.Gln232Ter) , P; c.158G>A (p.Arg53His), VUS	Mild HPA
